# Supplementary material for: Mussel-mimetic thermal conductive films with solid–solid phase change and shape-adaptive performance
Source: Royal Society of Chemistry journal article supplement (doi:10.1039/d4ta00031e), 2024-01-01
Supplement: d4ta00031e1.pdf [file d4ta00031e1.pdf]

1 **Supplementary Information**

2

3 **Mussel-mimetic Thermal Conductive Films with Solid-solid**

4 **Phase Change and Shape-adaptive Performance**

5 *Donglei Li<sup>a</sup>, Canxia Ding<sup>a</sup>, Sicong Shen<sup>a</sup>, Jun Wang<sup>a</sup>, Limin Wu<sup>a</sup>, Bo You<sup>a\*</sup>, Guibao Tao<sup>b\*</sup>*

6 <sup>a</sup> Department of Materials Science and Advanced Coatings Research Center of Ministry of

7 Education of China, Fudan University, Shanghai, 200438, People's Republic of China.

8 <sup>b</sup> State Key Laboratory of Mechanical Transmissions/ College of Mechanical and Vehicle

9 Engineering, Chongqing University, Chongqing 400044, P. R. China

10 Corresponding Author

11 \*E-mail: youbo@fudan.edu.cn (B. You), gbtao@cqu.edu.cn (G.B. Tao)

12

1 **This file contains**

2 S1. Supporting figures: Figure S1-S8

3 S2. Supporting tables: Table S1-S5

4

5

6

1  
2  
3  
4  
5  
6  
7  
8  
9  
10  
11  
12  
13  
14  
15  
16  
17  
18  
19

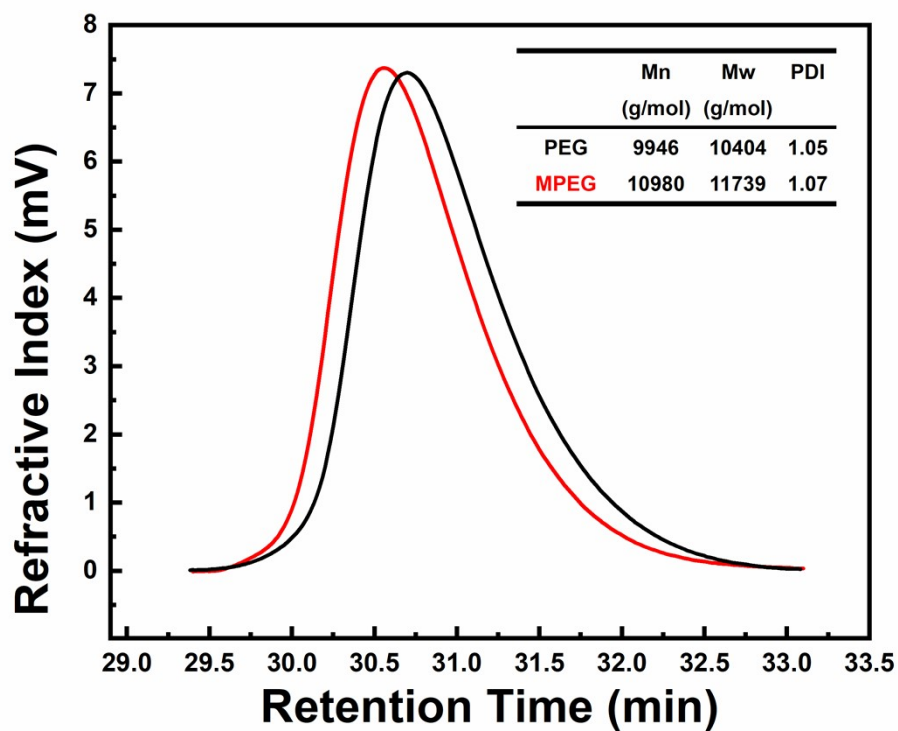

Figure S1. Gel permeation chromatography (GPC) of PEG and MPEG.

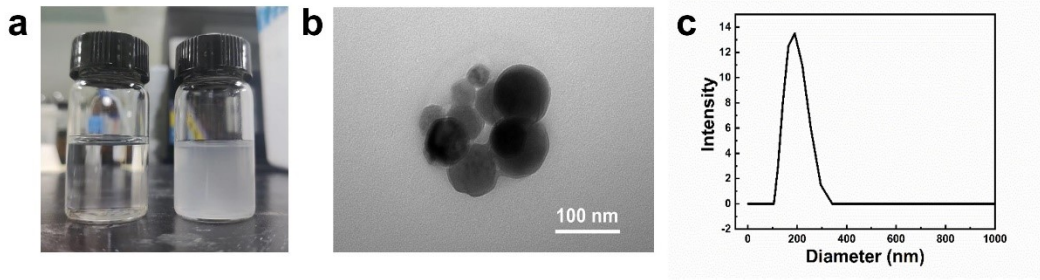

1

2 Figure S2. (a) Photos of PEG (left) and MPEG (right) aqueous solutions at 10 mg/mL.

3 (b) High contrast transmission electron microscopy image of MPEG spherical

4 aggregates in 10 mg/mL aqueous solution. (c) Particle size distribution of MPEG

5 spherical aggregates in 10 mg/mL aqueous solution.

6

7

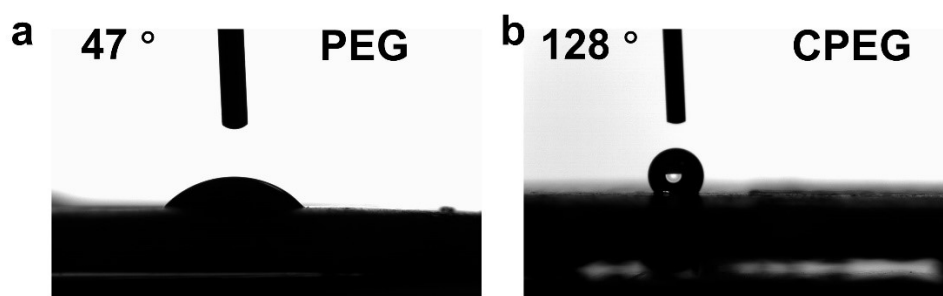

1

2 Figure S3. Water contact angle of (a) PEG film and (b) CPEG film.

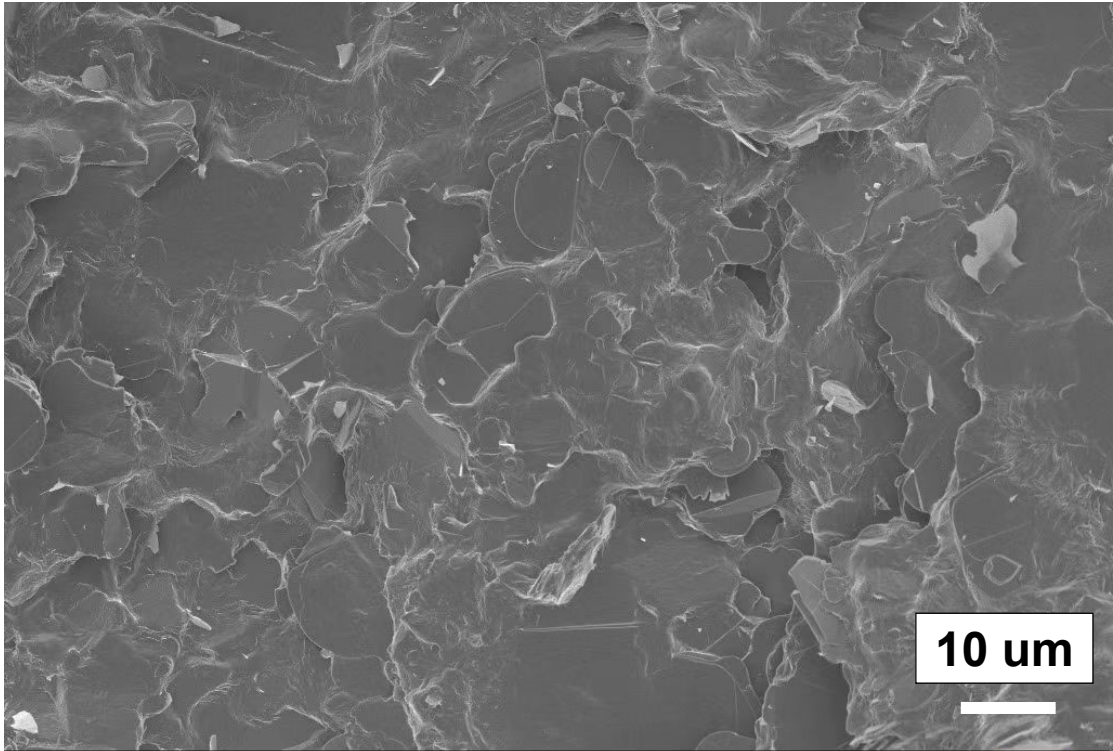

1 Figure S4. SEM image of the surface of bio-BN/CPEG film with 20vol% BN filling.  
2  
3  
4  
5  
6  
7  
8  
9  
10

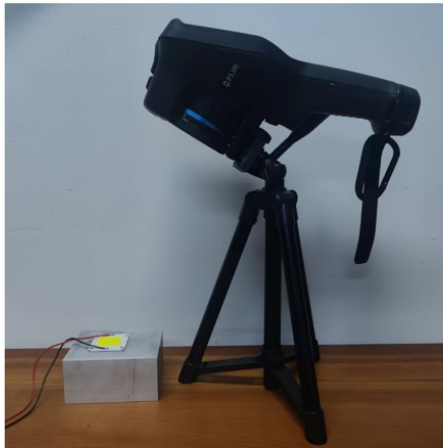

- 1
- 2 Figure S5. Photo of using an infrared thermal imager to test LED lamp bead
- 3 temperature.
- 4

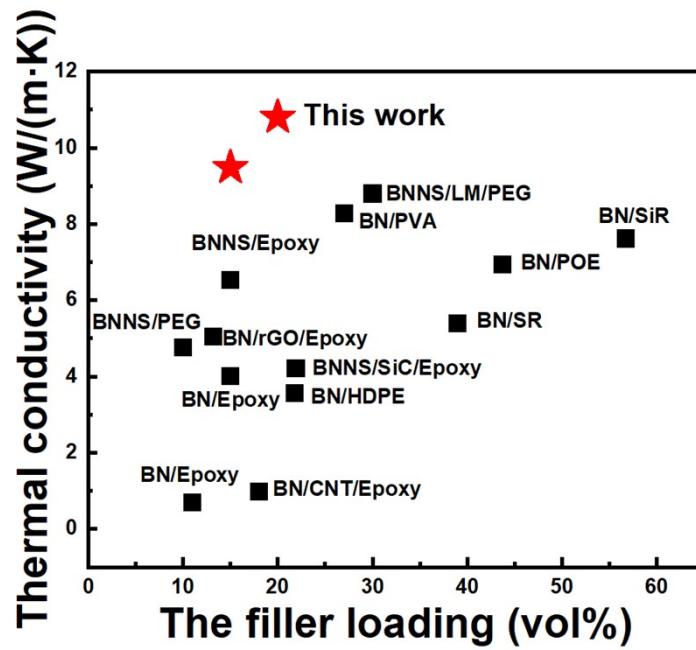

1

2 Figure S6. Comparison the maximum thermal conductivity of our film with the  
 3 previously reported BN-based polymer composites under different BN loading loads.

4

5

6

7

8

9



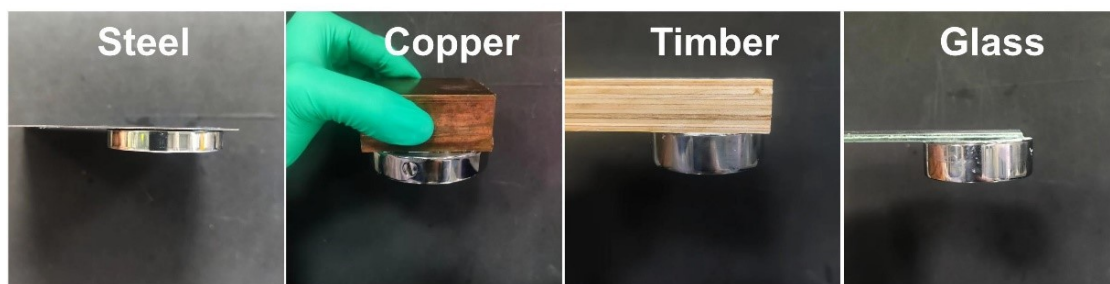

1  
2 Figure S7. Demonstration of adhesion of bio-composite films with 20 vol% BN filler  
3 to different substrates at room temperature.

4  
5  
6  
7

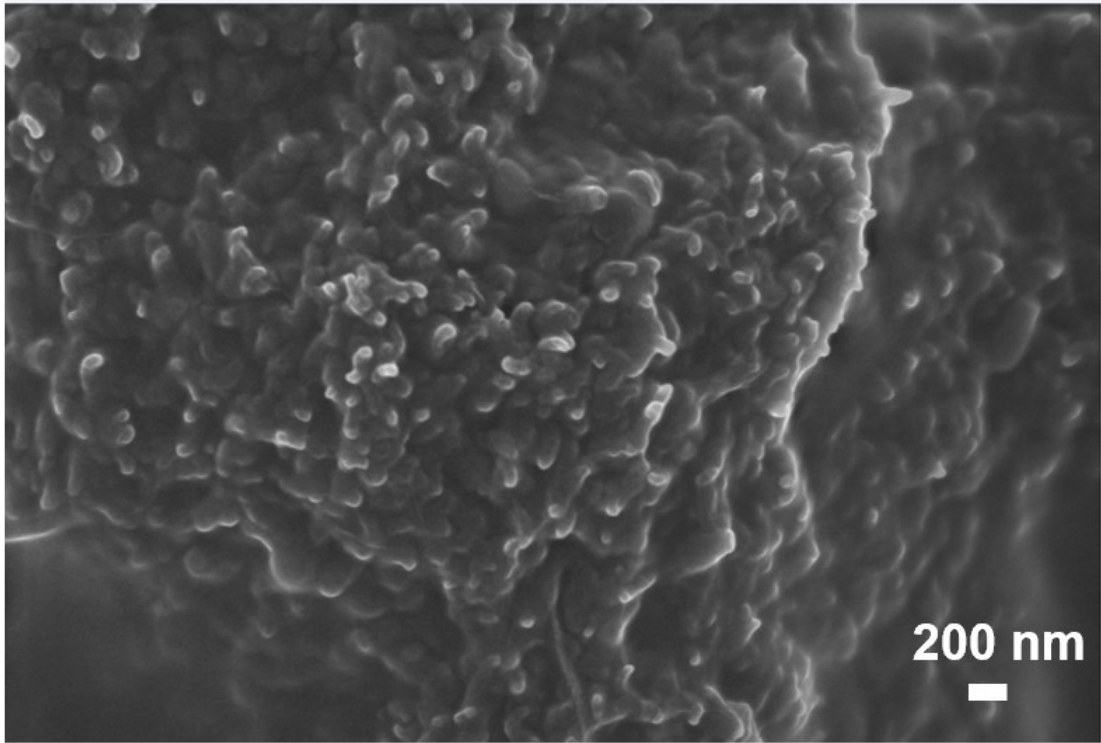

1  
2  
3  
4  
5  
6

Figure S8 SEM images of MPEG aggregates in aqueous solution at high concentration (100 mg/mL).

1 Table S1 The difference of boron nitride content and preparation method in different  
 2 samples.

| Samples      | The volume fraction of BN (%) | The mass fraction of BN (%) | Whether or not it has undergone a hot-pressing process |
|--------------|-------------------------------|-----------------------------|--------------------------------------------------------|
| O-BN/CPEG-5  | 5                             | 9                           | Yes                                                    |
| O-BN/CPEG-10 | 10                            | 18                          | Yes                                                    |
| O-BN/CPEG-15 | 15                            | 27                          | Yes                                                    |
| O-BN/CPEG-20 | 20                            | 34                          | Yes                                                    |
| R-BN/CPEG-5  | 5                             | 9                           | No                                                     |
| R-BN/CPEG-10 | 10                            | 18                          | No                                                     |
| R-BN/CPEG-15 | 15                            | 27                          | No                                                     |
| R-BN/CPEG-20 | 20                            | 34                          | No                                                     |

3  
 4  
 5  
 6  
 7  
 8  
 9

1 Table S2 DSC heating and cooling characteristics of the samples in the temperature  
2 range of -10-90 °C.

| Sample       | $\Delta H_h$ [J/g] | $T_h$ [°C] | $\Delta H_c$ [J/g] | $T_c$ [°C] |
|--------------|--------------------|------------|--------------------|------------|
| PEG          | 178                | 65.2       | 173                | 39.9       |
| CPEG         | 155                | 59.8       | 151                | 43.2       |
| O-BN/CPEG-5  | 141                | 59.8       | 141                | 43.4       |
| O-BN/CPEG-10 | 124                | 59.1       | 120                | 44.0       |
| O-BN/CPEG-15 | 111                | 59.3       | 107                | 43.1       |
| O-BN/CPEG-20 | 103                | 59         | 101                | 43.5       |

3  
4  
5  
6  
7  
8  
9

1 Table S3 Comparison of the thermal conductivity of our O-BN/CPEG bio-composite  
 2 film with previously reported results

| Sample         | $\lambda_{\text{in-plane}}$<br>[W/(m · K)] | $\lambda_{\text{cross-plane}}$<br>[W/(m · K)] | The filler<br>loading<br>(vol%) | Reference |
|----------------|--------------------------------------------|-----------------------------------------------|---------------------------------|-----------|
| This work      | 9.48                                       | 1.44                                          | 15                              |           |
| This work      | 10.8                                       | 2.43                                          | 20                              |           |
| BNNS/GO/PEG    | 4.41                                       | 2.55                                          | 11.65                           | 1         |
| BNNS/LM/PEG    | 8.8                                        | 7.64                                          | 30                              | 2         |
| BN/CNT/Epoxy   | 0.98                                       | 0.99                                          | 18                              | 3         |
| BNNS/Epoxy     | 6.54                                       | 0.7                                           | 15                              | 4         |
| BNNS/SiC/Epoxy | 1.43                                       | 4.22                                          | 21.9                            | 5         |
| BNNS/PEG       | 4.76                                       | 1.29                                          | 10                              | 6         |
| BNNS/PDMS      | 11.05                                      | 1.15                                          | 10                              | 7         |
| BN/rGO/Epoxy   | 3.5                                        | 5.05                                          | 13.16                           | 8         |
| BN/HDPE        | 3.57                                       | 0.62                                          | 21.8                            | 9         |
| BN/PVA         | 8.28                                       | 0.63                                          | 27                              | 10        |
| BN/Epoxy       | 0.7                                        | 0.7                                           | 11                              | 11        |
| BN/POE         | 0.72                                       | 6.94                                          | 43.75                           | 12        |
| BN/SR          | 0.74                                       | 5.4                                           | 39                              | 13        |
| BN/SiR         | 1.3                                        | 7.62                                          | 56.7                            | 14        |
| BN/Epoxy       | 4.02                                       | 3.87                                          | 15                              | 15        |

3  
 4  
 5  
 6

1 Table S4 Comparison of the thermal conductivity and latent heat of phase transition of  
 2 our O-BN/CPEG bio-composite film with previously reported results for PEG-based  
 3 phase change materials

| Sample           | Latent heat<br>[J/g] | Thermal conductivity<br>[W/(m · K)] | The filler loading<br>(vol%) | Reference |
|------------------|----------------------|-------------------------------------|------------------------------|-----------|
| This work        | 141                  | 1.02                                | 5                            |           |
| This work        | 120                  | 1.52                                | 10                           |           |
| This work        | 107                  | 9.48                                | 15                           |           |
| This work        | 101                  | 10.8                                | 20                           |           |
| BNNS/GO/PEG      | 147.5                | 4.41                                | 11.65                        | 1         |
| BNMS/LM/PEG      | 80                   | 8.8                                 | 30                           | 2         |
| CNTs/PEG         | 78.5                 | 0.5                                 | 1.5                          | 16        |
| BN/CF/PEG        | 107.9                | 1.66                                | 32                           | 17        |
| WG/HNT@AgNPs/PEG | 103.6                | 1.15                                | 25                           | 18        |
| CNT/PVP/PEG      | 103                  | 0.265                               | 4.1                          | 19        |
| BNNS/GO/PEG      | 121.9                | 2.62                                | 10                           | 20        |
| BNNS/PEG         | 122.8                | 4.76                                | 10                           | 6         |
| BNNS/GNP/PEG     | 116                  | 1.33                                | 17                           | 21        |
| BN/BC/PEG        | 134                  | 3.26                                | 16.3                         | 22        |
| BN/GO/PEG        | 131                  | 2.36                                | 12.5                         | 23        |
| BP/PEG           | 103                  | 1.81                                | 20                           | 24        |

4  
 5  
 6  
 7  
 8  
 9  
 10  
 11  
 12

1 Table S5 Thermal diffusion coefficient, density, specific heat capacity and thermal  
 2 conductivity of O-BN/CPEG bio-composite film with different hexagonal boron nitride  
 3 micron content.

| Sample                         | Thermal diffusion<br>coefficient<br>[mm <sup>2</sup> /s] | Density<br>[g/cm <sup>3</sup> ] | Specific heat<br>capacity<br>[J/(g·K)] | Thermal<br>conductivity<br>[W/(m·K)] |
|--------------------------------|----------------------------------------------------------|---------------------------------|----------------------------------------|--------------------------------------|
| CPEG<br>(in-plane)             | 0.19                                                     | 1.1                             | 1.91                                   | 0.40                                 |
| CPEG<br>(out-of-plane)         | 0.12                                                     | 1.1                             | 1.91                                   | 0.25                                 |
| O-BN/CPEG-5<br>(in-plane)      | 0.45                                                     | 1.17                            | 1.95                                   | 1.02                                 |
| O-BN/CPEG-5<br>(out-of-plane)  | 0.18                                                     | 1.17                            | 1.95                                   | 0.41                                 |
| O-BN/CPEG-10<br>(in-plane)     | 0.63                                                     | 1.28                            | 1.86                                   | 1.52                                 |
| O-BN/CPEG-10<br>(out-of-plane) | 0.30                                                     | 1.28                            | 1.86                                   | 0.72                                 |
| O-BN/CPEG-15<br>(in-plane)     | 4.05                                                     | 1.36                            | 1.72                                   | 9.48                                 |
| O-BN/CPEG-15<br>(out-of-plane) | 0.62                                                     | 1.36                            | 1.72                                   | 1.44                                 |
| O-BN/CPEG-20<br>(in-plane)     | 4.50                                                     | 1.41                            | 1.71                                   | 10.85                                |
| O-BN/CPEG-20<br>(out-of-plane) | 1.01                                                     | 1.41                            | 1.71                                   | 2.44                                 |

4  
 5  
 6  
 7

1 Reference

2

3

- 4 1 D. Liu, C. Lei, K. Wu, *et al.*, A multidirectionally thermoconductive phase  
5 change material enables high and durable electricity via real-environment solar-  
6 thermal-electric conversion, *ACS Nano*, 2020, **14**(11), 15738-15747.
- 7 2 C. Guo, L. He, Y. Yao, *et al.*, Bifunctional liquid metals allow electrical  
8 insulating phase change materials to dual-mode thermal manage the li-ion  
9 batteries, *Nano-Micro Lett.*, 2022, **14**(1), 202.
- 10 3 Z. Su, H. Wang, J. He, *et al.*, Fabrication of thermal conductivity enhanced  
11 polymer composites by constructing an oriented three-dimensional staggered  
12 interconnected network of boron nitride platelets and carbon nanotubes, *ACS*  
13 *Appl. Mater. Interfaces*, 2018, **10**(42), 36342-36351.
- 14 4 J. Han, G. Du, W. Gao, *et al.*, An anisotropically high thermal conductive boron  
15 nitride/epoxy composite based on nacre-mimetic 3d network, *Adv. Funct.*  
16 *Mater.*, 2019, **29**(13), 1900412.
- 17 5 C. Xiao, Y. Guo, Y. Tang, *et al.*, Epoxy composite with significantly improved  
18 thermal conductivity by constructing a vertically aligned three-dimensional  
19 network of silicon carbide nanowires/ boron nitride nanosheets, *Compos. B.*  
20 *Eng.*, 2020, **187**, 107855.
- 21 6 C. Lei, K. Wu, L. Wu, *et al.*, Phase change material with anisotropically high  
22 thermal conductivity and excellent shape stability due to its robust  
23 cellulose/bnss skeleton, *J. Mater. Chem. A*, 2019, **7**(33), 19364-19373.
- 24 7 H. Hong, Y. H. Jung, J. S. Lee, *et al.*, Anisotropic thermal conductive composite  
25 by the guided assembly of boron nitride nanosheets for flexible and stretchable  
26 electronics, *Adv. Funct. Mater.*, 2019, **29**(37), 1902575.
- 27 8 Y. Yao, J. Sun, X. Zeng, *et al.*, Construction of 3d skeleton for polymer  
28 composites achieving a high thermal conductivity, *Small*, 2018, **14**(13),  
29 1704044.
- 30 9 X. Zhang, J. Zhang, L. Xia, *et al.*, Simple and consecutive melt extrusion  
31 method to fabricate thermally conductive composites with highly oriented  
32 boron nitrides, *ACS Appl. Mater. Interfaces*, 2017, **9**(27), 22977-22984.
- 33 10 J. Zhang, X. Wang, C. Yu, *et al.*, A facile method to prepare flexible boron  
34 nitride/poly(vinyl alcohol) composites with enhanced thermal conductivity,  
35 *Compos. Sci. Technol.*, 2017, **149**, 41-47.
- 36 11 J. Ma, N. Luo, Z. Xie, *et al.*, Preparation of modified hexagonal boron nitride by  
37 ball-milling and enhanced thermal conductivity of epoxy resin, *Mater. Res.*  
38 *Express*, 2019, **6**(10), 1050d1058.
- 39 12 C. P. Feng, L. Bai, R. Y. Bao, *et al.*, Electrically insulating poe/bn elastomeric  
40 composites with high through-plane thermal conductivity fabricated by two-roll  
41 milling and hot compression, *Adv. Compos. Hybrid Mater.*, 2018, **1**(1), 160-  
42 167.
- 43 13 Y. Xue, X. Li, H. Wang, *et al.*, Improvement in thermal conductivity of through-  
44 plane aligned boron nitride/silicone rubber composites, *Mater. Des.*, 2019, **165**,  
45 107580.
- 46 14 Q. Hu, X. Bai, C. Zhang, *et al.*, Oriented bn/silicone rubber composite thermal  
47 interface materials with high out-of-plane thermal conductivity and flexibility,  
48 *Compos. Part A Appl. Sci. Manuf.*, 2022, **152**, 106681.
- 49 15 T. Huang, Y. Li, M. Chen, *et al.*, Bi-directional high thermal conductive epoxy  
50 composites with radially aligned boron nitride nanosheets lamellae, *Compos.*  
51 *Sci. Technol.*, 2020, **198**, 108322.
- 52 16 J. Shi, W. Aftab, Z. Liang, *et al.*, Tuning the flexibility and thermal storage  
53 capacity of solid-solid phase change materials towards wearable applications,  
54 *J. Mater. Chem. A*, 2020, **8**(38), 20133-20140.
- 55 17 S. Gong, X. Li, M. Sheng, *et al.*, High thermal conductivity and mechanical



1 strength phase change composite with double supporting skeletons for industrial  
2 waste heat recovery, *ACS Appl. Mater. Interfaces*, 2021, **13**(39), 47174-47184.  
3 18 W. Yang, R. Lin, X. Li, *et al.*, High thermal conductive and anti-leakage  
4 composite phase change material with halloysite nanotube for battery thermal  
5 management system, *J. Energy Storage*, 2023, **66**, 107372.  
6 19 W. Zhang, X. Zhang, Y. Xu, *et al.*, Flexible polyethylene  
7 glycol/polyvinylpyrrolidone composite phase change fibres: Preparation,  
8 characterization, and thermal conductivity enhancement, *Polymer*, 2021, **214**,  
9 123258.  
10 20 Y. Lu, R. Hu, X. Chen, *et al.*, A strategy for constructing 3d ordered boron  
11 nitride aerogels-based thermally conductive phase change composites for  
12 battery thermal management, *J Mater Sci Technol*, 2023, **160**, 248-257.  
13 21 J. Yang, L. S. Tang, R. Y. Bao, *et al.*, Largely enhanced thermal conductivity of  
14 poly (ethylene glycol)/boron nitride composite phase change materials for solar-  
15 thermal-electric energy conversion and storage with very low content of  
16 graphene nanoplatelets, *Chem. Eng. J.*, 2017, **315**, 481-490.  
17 22 L. S. Tang, Y. C. Zhou, L. Zhou, *et al.*, Double-layered and shape-stabilized  
18 phase change materials with enhanced thermal conduction and reversible  
19 thermochromism for solar thermoelectric power generation, *Chem. Eng. J.*,  
20 2022, **430**(2), 132773.  
21 23 J. Yang, P. Yu, L. S. Tang, *et al.*, Hierarchically interconnected porous scaffolds  
22 for phase change materials with improved thermal conductivity and efficient  
23 solar-to-electric energy conversion, *Nanoscale*, 2017, **9**(45), 17704-17709.  
24 24 Y. Wang, Y. Chen, W. Dai, *et al.*, Anisotropic black phosphorene structural  
25 modulation for thermal storage and solar-thermal conversion, *Small*, **19**(52),  
26 2303933.  
27
